# Supplementary material for: MicroRNA-29b-2-5p inhibits cell proliferation by directly targeting Cbl-b in pancreatic ductal adenocarcinoma
Source: PubMed Central journal article supplement (PMC6019739; doi:10.1186/s12885-018-4526-z), 2018-06-25

**A** Good prognosis(n=10)/Poor prognosis(n=10)

miRNA Array

**22** miRNAs upgraded

miRbase

4miRNAs:Dead miRNA Entry

**18**miRNAs, compared with miRNA array

qRT-PCR

**16**miRNAs coherent

**2** miRNAs opposite

miRwalk and starBase

**7**miRNAs had target gene

Cell lines

**3** miRNAs inhibited proliferation

**miR-29b-2-5p** most stable in both *in vivo* and *in vitro*

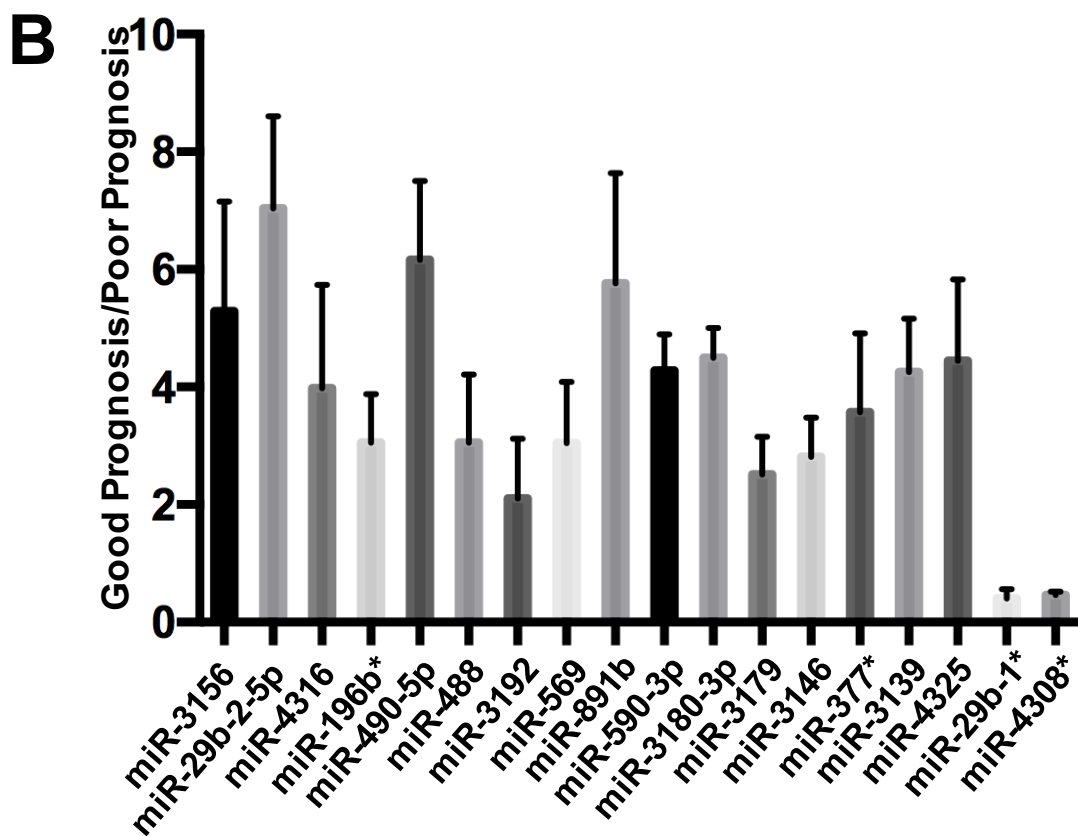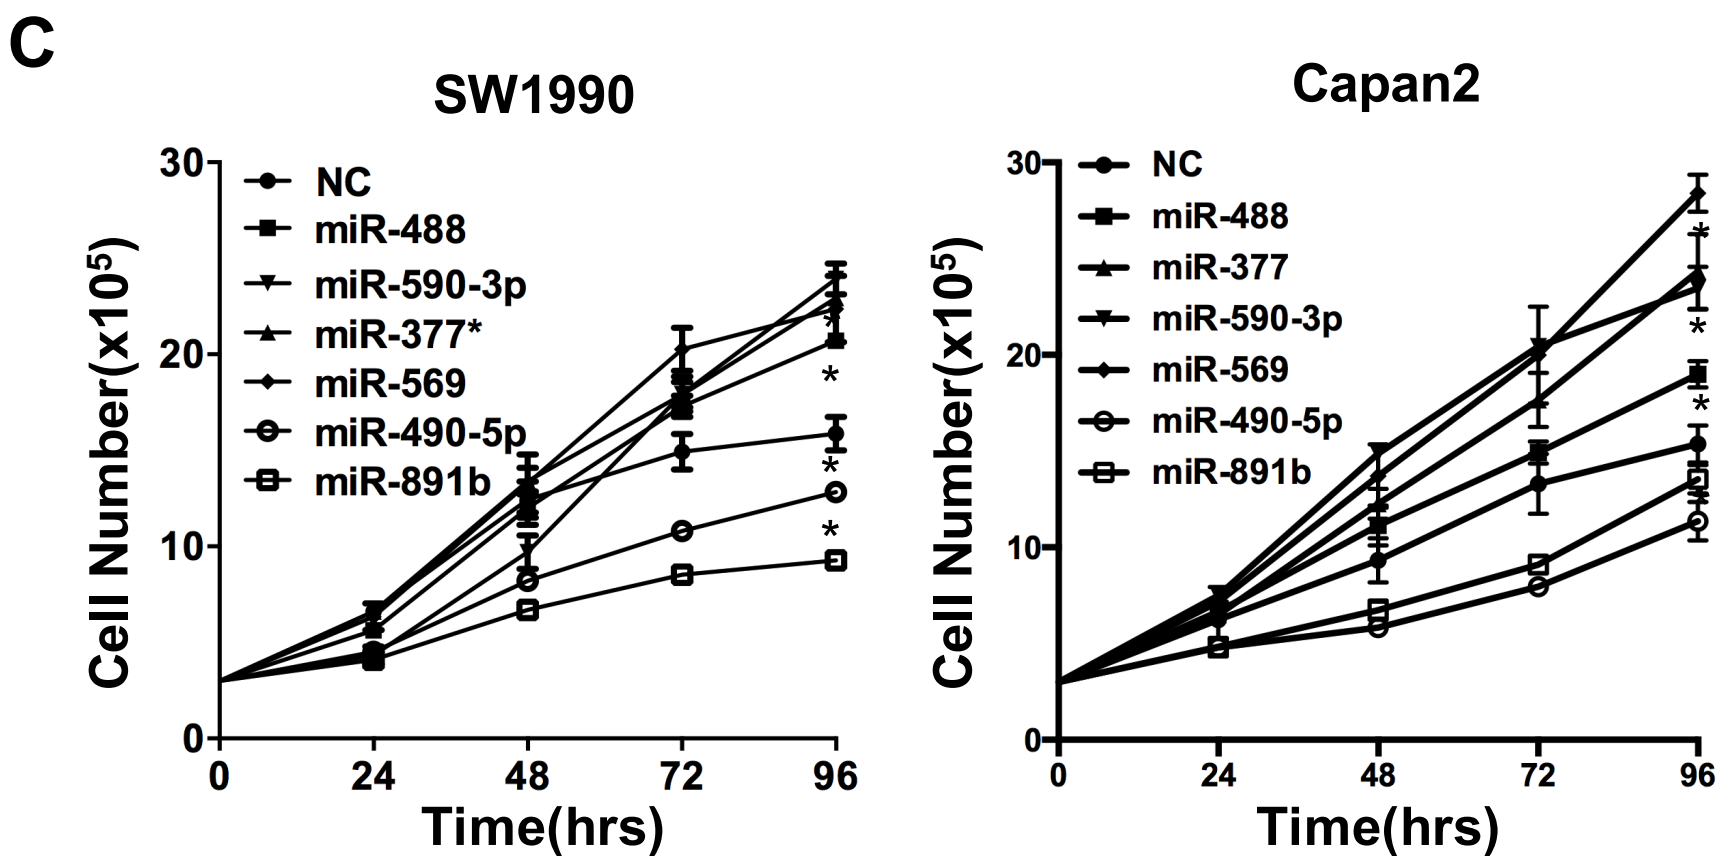

Supplement: 12885_2018_4526_MOESM1_ESM.pdf [file 12885_2018_4526_MOESM1_ESM.pdf]
