# Supplementary material for: MicroRNA-29b-2-5p inhibits cell proliferation by directly targeting Cbl-b in pancreatic ductal adenocarcinoma
Source: Springer Nature journal article supplement (doi:10.1186/s12885-018-4526-z), 2018-06-25

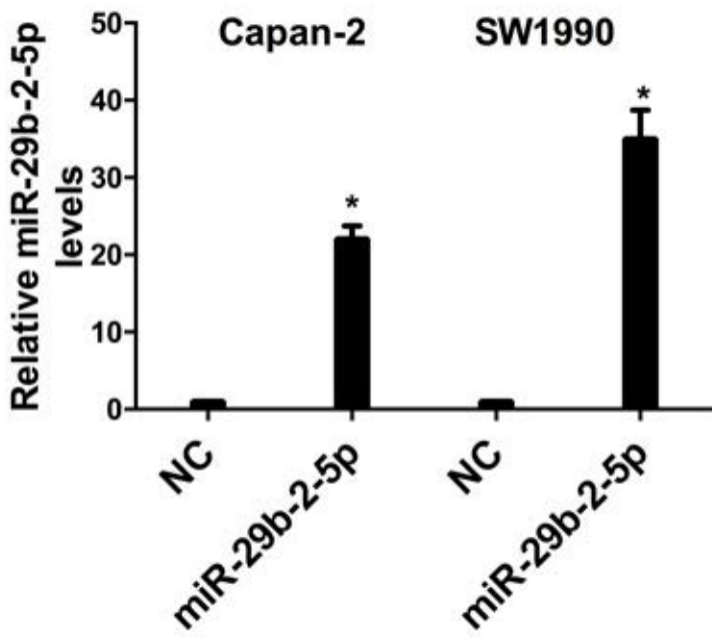

Supplement: MOESM4 [file 15878332]
